# Supplementary material for: Satisfaction of Cancer Patients Treated with Oral Anticancer Medications regarding Dispensing by Community Pharmacists: A Cross-Sectional Study
Source: Hindawi journal article supplement (doi:10.1155/2023/7746349), 2023-08-29
Supplement: f1 [file 7746349.f1.docx]

| **International nonproprietary names**  **(mechanism of action, French indications)** | **Pharmacological class** | **% (n)** |
| --- | --- | --- |
| **Imatinib** (tyrosine kinase inhibitor, Chronic myelogenous leukemia and various cancers) | Targeted therapy | 11 (10) |
| **Letrozole** (aromatase inhibitor, breast cancer) | Hormone therapy | 8.8 (8) |
| **Dabrafenib** (protein kinase inhibitor, advanced melanoma with BRAF mutation) | Targeted therapy | 7.7 (7) |
| **Gefitinib** (tyrosine kinase inhibitor of epidermal growth factor receptor, non-small cell lung cancer) | Targeted therapy | 6.6 (6) |
| **Tamoxifene** (anti-estrogen, breast cancer) | Hormone therapy | 6.6 (6) |
| **Sunitinib** (tyrosine kinase inhibitor, kidney cancer, neuroendocrine pancreatic tumors and gastrointestinal stromal tumors) | Targeted therapy | 6.6 (6) |
| **Trametinib** (MEK protein kinase inhibitor, advanced melanoma with BRAF mutation and advanced non-small cell lung cancer with BRAF mutation) | Targeted therapy | 6.6 (6) |
| **Anastrozole** (aromatase inhibitor, hormone dependent breast cancer) | Hormone therapy | 5.5 (5) |
| **Afatinib** (tyrosine kinase inhibitor, non-small cell lung cancer) | Targeted therapy | 5.5 (5) |
| **Erlotinib** (tyrosine kinase inhibitor of epidermal growth factor receptor, non-small cell lung cancer and pancreatic cancer) | Targeted therapy | 5.5 (5) |
| **Everolimus** (mTOR inhibitor, breast cancer and tumor of pancreatic origin) | Targeted therapy | 3.3 (3) |
| **Ibrutinib** (Bruton’s tyrosine kinase inhibitor, mantle cell lymphoma and chronic lymphocytic leukemia and Waldenström's macroglobulinemia) | Targeted therapy | 3.3 (3) |
| **Pazopanib** (tyrosine kinase inhibitor, advanced kidney cancer and soft-tissue sarcoma) | Targeted therapy | 3.3 (3) |
| **Capecitabine** (antimetabolite, breast cancer and gastric cancer and colorectal cancer) | Cytotoxic | 3.3 (3) |
| **Ceritinib** (tyrosine kinase ALK inhibitor, advanced or metastatic non-small cell lung cancer with rearrangement of ALK gene) | Targeted therapy | 3.3 (3) |
| **Exemestane** (aromatase inhibitor, breast cancer) | Hormone therapy | 2.2 (2) |
| **Cyclophosphamide** (alkylating agent, various cancers) | Cytotoxic | 2.2 (2) |
| **Hydroxycarbamide** (cytostatic, Chronic myelogenous leukemia and polyglobulia and essential thrombocythemia) | Cytotoxic | 2.2 (2) |
| **Crizotinib** (tyrosine kinase inhibitor, non-small cell lung cancer) | Targeted therapy | 2.2 (2) |
| **Melphalan** (alkylating agent, various cancers) | Cytotoxic | 1.1 (1) |
| **Ruxolitinib** (tyrosine kinase JAK inhibitor, myelofibrosis or Polycythemia vera) | Targeted therapy | 1.1 (1) |
| **Dasatinib** (tyrosine kinase inhibitor, chronic myelogenous leukemia) | Targeted therapy | 1.1 (1) |
| **Regorafenib** (protein kinase inhibitor, colorectal cancer) | Targeted therapy | 1.1 (1) |
| **Enzalutamide** (antiandrogen, metastatic castration-resistant prostate cancer) | Hormone therapy | 1.1 (1) |
| **Vemurafenib** (BRAF protein kinase inhibitor, advanced melanoma with BRAF mutation) | Targeted therapy | 1.1 (1) |
| **Abiraterone acetate** (antiandrogen, prostate cancer) | Hormone therapy | 1.1 (1) |
| **Cobimetinib** (MEK inhibitor, advanced melanoma with BRAF mutation) | Targeted therapy | 1.1 (1) |
| **Palbociclib** (protein kinase inhibitor, advanced breast cancer) | Targeted therapy | 1.1 (1) |
| **Topotecan** (topoisomerase I inhibitor, small-cell lung cancer with relapsed and metastatic ovarian cancer | Cytotoxic | 1.1 (1) |
| **Lenvatinib** (protein kinase inhibitor, radioactive iodine-refractory differentiated thyroid cancer) | Targeted therapy | 1.1 (1) |

**List of OAMs among the 91 patients analyzed**
